# Supplementary material for: Preparation and electroactive phase adjustment of Ag-doped poly(vinylidene fluoride) (PVDF) films
Source: RSC Adv. 2019 Dec 4;9(69):40286–91. doi: 10.1039/c9ra08763j (PMC9076169; doi:10.1039/c9ra08763j)
Supplement: RA-009-C9RA08763J-s001 [file RA-009-C9RA08763J-s001.pdf]

## Supporting Information

# **Preparation and electroactive phase adjustment of Ag-doped poly (vinylidene fluoride) (PVDF) films**

Seung-Hyun Kim<sup>a,b</sup>, So-Jeong Park<sup>a</sup>, Chang-Yeol Cho<sup>a</sup>, Hong Suk Kang<sup>a</sup>, Eun-Ho Sohn<sup>a</sup>, In Jun Park<sup>a</sup>, Jong-Wook Ha<sup>a</sup> and Sang Goo Lee<sup>a,\*</sup>

<sup>a</sup> Interface Materials and Chemical Engineering Research Center, Korea Research Institute of Chemical Technology, Daejeon, 34114, Republic of Korea

<sup>b</sup> School of Chemical Engineering, Sungkyunkwan University, Suwon 16419 Republic of Korea

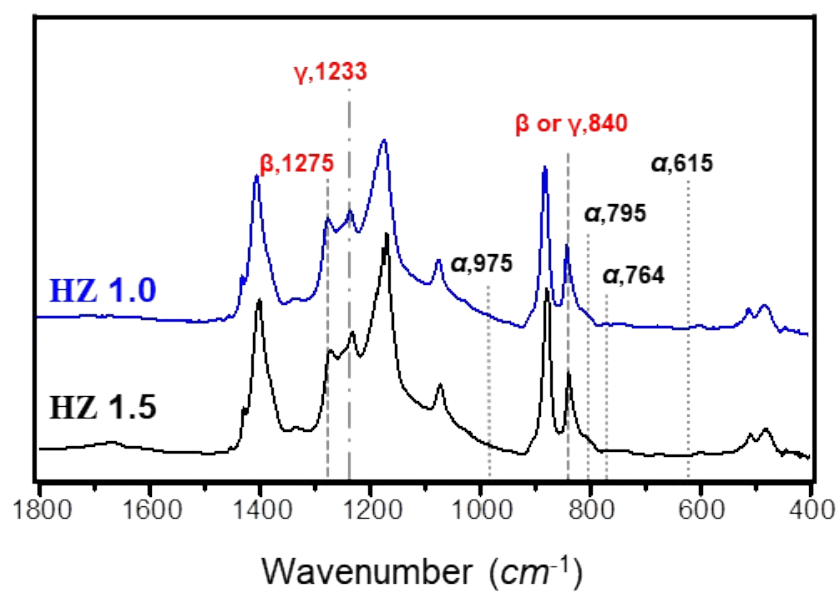

**Figure S1.** FT-IR spectra for  $\text{Ag}^+/\text{AgNP}/\text{PVDF}$  composite film according to the amount of hydrazine.

**Table S1.** The melting enthalpy ( $\Delta H_f$ ) and total crystallinity ( $X_c$ ) of PVDF films with 0.06, 0.22, 0.96, 3.40, and 5.10 wt.% AgNO<sub>3</sub>, as measured before and after washing process.

|      | Before washing         |                   | After washing          |                   |
|------|------------------------|-------------------|------------------------|-------------------|
|      | Melting Enthalpy (J/g) | Crystallinity (%) | Melting Enthalpy (J/g) | Crystallinity (%) |
| 0    | 43.63                  | 41.67             | 43.63                  | 41.67             |
| 0.06 | 43.84                  | 41.87             | 44.25                  | 42.26             |
| 0.22 | 44.95                  | 42.93             | 44.50                  | 42.50             |
| 0.96 | 44.82                  | 42.81             | 44.64                  | 42.64             |
| 3.4  | 44.05                  | 42.07             | 44.17                  | 42.19             |
| 5.1  | 45.37                  | 43.33             | 44.72                  | 42.71             |

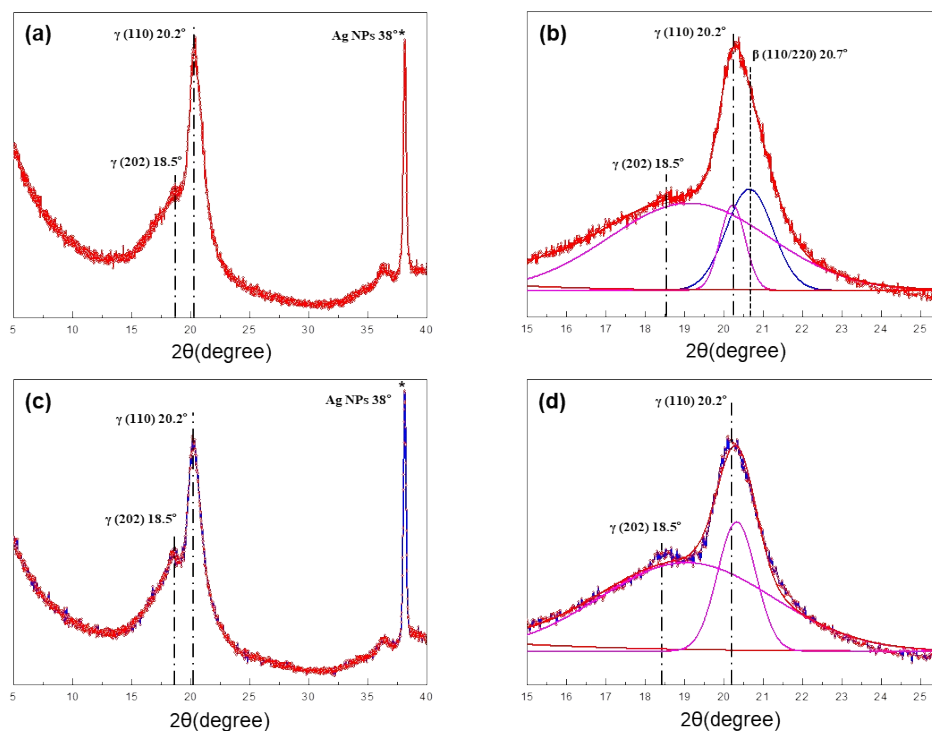

**Figure S2.** XRD patterns and their curve deconvolution of (a)(b) PVDF-Ag 3.40 wt.% before washing process, (c)(d) PVDF-Ag 3.40 wt.% after washing process. The dotted points are experimental data, and the solid lines correspond to the best curve fit. the peaks marked with \* correspond to Ag nanoparticles.
